# Supplementary material
Source: HighWire-hosted journal article supplement (https://bmjopen.bmj.com/content/14/1/e080068)
Supplement: inline-supplementary-material-1 [file inline-supplementary-material-1.pdf]

Risk assessment and real-world outcomes in chronic thromboembolic pulmonary hypertension: insights from a UK pulmonary hypertension referral service

Supplementary tables

Supplementary Table 1. Average HCRU and associated costs per year at 1- and 3-years' follow-up post-diagnosis, by cohort

|                                                    | Operated patients           |                              | Not-operated patients       |                              |
|----------------------------------------------------|-----------------------------|------------------------------|-----------------------------|------------------------------|
|                                                    | 1-year follow-up<br>(n=237) | 3-year follow-up*<br>(n=134) | 1-year follow-up<br>(n=292) | 3-year follow-up*<br>(n=149) |
| HCRU, per patient per year of follow-up, n         |                             |                              |                             |                              |
| Inpatient hospitalisations (>1 day)                |                             |                              |                             |                              |
| Mean (SD)                                          | 2.5 (1.8)                   | 1.7 (1.1)                    | 1.2 (1.5)                   | 0.8 (1.2)                    |
| Median (Q1, Q3)                                    | 2.0 (1.0, 3.0)              | 1.7 (1.0, 2.0)               | 1.0 (0.0, 2.0)              | 0.3 (0.3, 1.0)               |
| Duration (>1 day) inpatient hospitalisations, days |                             |                              |                             |                              |
| Mean (SD)                                          | 10.2 (8.0)                  | 7.8 (5.7)                    | 6.8 (10.0)                  | 6.1 (7.0)                    |
| Median (Q1, Q3)                                    | 8.7 (6.0, 12.0)             | 6.3 (5.3, 8.7)               | 3.0 (2.0, 8.0)              | 3.5 (2.0, 6.8)               |
| Same-day visits                                    |                             |                              |                             |                              |
| Mean (SD)                                          | 2.1 (1.5)                   | 2.0 (2.6)                    | 2.4 (1.9)                   | 1.9 (1.2)                    |
| Median (Q1, Q3)                                    | 2.0 (1.0, 3.0)              | 1.7 (1.3, 2.3)               | 2.0 (1.0, 3.0)              | 1.7 (1.3, 2.7)               |
| Outpatient consultations                           |                             |                              |                             |                              |
| Mean (SD)                                          | 9.7 (10.5)                  | 8.6 (8.1)                    | 10.8 (10.3)                 | 9.0 (7.1)                    |
| Median (Q1, Q3)                                    | 5.0 (3.0, 12.0)             | 5.7 (3.3, 10.7)              | 7.0 (4.0, 15.0)             | 7.0 (4.0, 11.7)              |
| A&E visits                                         |                             |                              |                             |                              |
| Mean (SD)                                          | 1.0 (2.1)                   | 0.8 (1.4)                    | 0.9 (1.5)                   | 0.7 (1.2)                    |
| Median (Q1, Q3)                                    | 0.0 (0.0, 1.0)              | 0.3 (0.0, 1.0)               | 0.0 (0.0, 1.0)              | 0.3 (0.0, 1.0)               |

|                                                | Operated patients   |                     | Not-operated patients |                      |
|------------------------------------------------|---------------------|---------------------|-----------------------|----------------------|
| Costs (GBP), per patient per year of follow-up |                     |                     |                       |                      |
| Inpatient hospitalisations (>1 day)            |                     |                     |                       |                      |
| Mean (SD)                                      | 4215 (4693)         | 2539 (2813)         | 3101 (4718)           | 1901 (2951)          |
| Median (Q1, Q3)                                | 2836<br>(0, 6941)   | 1862<br>(828, 3474) | 1527<br>(0, 3681)     | 1015<br>(176, 2279)  |
| Same-day spells                                |                     |                     |                       |                      |
| Mean (SD)                                      | 1971 (1483)         | 1855 (3911)         | 2247 (2767)           | 1704 (1410)          |
| Median (Q1, Q3)                                | 1838<br>(989, 2813) | 1407<br>(871, 1897) | 1992<br>(1002, 2899)  | 1580<br>(1012, 2191) |
| Outpatient consultations                       |                     |                     |                       |                      |
| Mean (SD)                                      | 1448 (1361)         | 1173 (1046)         | 1476 (1447)           | 1212 (954)           |
| Median (Q1, Q3)                                | 935<br>(604, 1705)  | 849<br>(543, 1368)  | 1043<br>(592, 1825)   | 983<br>(578, 1544)   |
| A&E visits                                     |                     |                     |                       |                      |
| Mean (SD)                                      | 112 (200)           | 86 (143)            | 115 (222)             | 94 (184)             |
| Median (Q1, Q3)                                | 0 (0, 169)          | 47 (0, 104)         | 0 (0, 148)            | 40 (0, 114)          |
| Total mean costs per patient                   | 7746                | 5653                | 6939                  | 4911                 |

\*HCRU and costs 3 years post-diagnosis represent the mean and median per year for patients with 3 years of follow-up data, not during the third year. Total costs represent the sum of means for the four types of HCRU.

A&E, accident and emergency; GBP, British Pound Sterling; HCRU, healthcare resource utilisation; SD standard deviation

Supplementary Table 2. Survival probabilities by cohort and risk group

|                              | Survival probability<br>(95% CI) |                      |                      |
|------------------------------|----------------------------------|----------------------|----------------------|
|                              | 1 year                           | 3 year               | 5 year               |
| <b>Not operated patients</b> | 0.85<br>(0.82, 0.89)             | 0.63<br>(0.58, 0.69) | 0.49<br>(0.43, 0.56) |
| Low-risk                     | 0.91<br>(0.81, 1.00)             | 0.91<br>(0.81, 1.00) | 0.91<br>(0.81, 1.00) |
| Intermediate-risk            | 0.91<br>(0.87, 0.95)             | 0.70<br>(0.64, 0.78) | 0.59<br>(0.50, 0.68) |
| High-risk                    | 0.76<br>(0.68, 0.84)             | 0.48<br>(0.39, 0.58) | 0.29<br>(0.20, 0.41) |
| <b>Operated patients</b>     | 0.98<br>(0.96, 1.00)             | 0.91<br>(0.87, 0.95) | 0.83<br>(0.78, 0.90) |
| Low-risk                     | 1.00<br>(1.00, 1.00)             | 0.94<br>(0.84, 1.00) | 0.94<br>(0.84, 1.00) |
| Intermediate-risk            | 0.98<br>(0.95, 1.00)             | 0.92<br>(0.88, 0.97) | 0.83<br>(0.75, 0.92) |
| High-risk                    | 0.97<br>(0.92, 1.00)             | 0.85<br>(0.76, 0.95) | 0.79<br>(0.67, 0.92) |

Supplementary Table 3. Patient characteristics included in the Kylhammar risk assessment tool [32]

| Determinants of prognosis  | Low risk                                                             | Intermediate risk                                                           | High risk                                                             |
|----------------------------|----------------------------------------------------------------------|-----------------------------------------------------------------------------|-----------------------------------------------------------------------|
| WHO FC                     | I, II                                                                | III                                                                         | IV                                                                    |
| 6MWD                       | >440 m                                                               | 165–440 m                                                                   | <165 m                                                                |
| NT-proBNP levels           | <300 ng/L                                                            | 300–1400 ng/L                                                               | >1400 ng/L                                                            |
| Imaging (echocardiography) | RA area <18 cm <sup>2</sup><br>No pericardial effusion               | RA area 18–26 cm <sup>2</sup><br>No or minimal pericardial effusion         | RA area >26 cm <sup>2</sup><br>Pericardial effusion                   |
| Haemodynamics              | RAP <8 mmHg<br>CI ≥2.5 L/min/m <sup>2</sup><br>SvO <sub>2</sub> >65% | RAP 8–14 mmHg<br>CI 2.0–2.4 L/min/m <sup>2</sup><br>SvO <sub>2</sub> 60–65% | RAP >14 mmHg<br>CI <2.0 L/min/m <sup>2</sup><br>SvO <sub>2</sub> <60% |

Source: Kylhammar et al. 2018 [32]

6MWD, 6-minute walking distance; CI, cardiac index; NT-proBNP, N-terminal prohormone of brain natriuretic peptide; RA, right atrium; RAP, right atrial pressure; SvO<sub>2</sub>, mixed venous oxygen saturation; WHO FC, World Health Organization functional class

Supplementary Table 4. Final risk category assessment strategy

| Variables included in risk score at each assessment point                                                                                                                                                                                                                                                                                                      | Risk score methodology                                                                                                                                                                                                                                                                                                                                                                                                                                                                                                          |
|----------------------------------------------------------------------------------------------------------------------------------------------------------------------------------------------------------------------------------------------------------------------------------------------------------------------------------------------------------------|---------------------------------------------------------------------------------------------------------------------------------------------------------------------------------------------------------------------------------------------------------------------------------------------------------------------------------------------------------------------------------------------------------------------------------------------------------------------------------------------------------------------------------|
| <div><div>1. WHO FC</div><div>2. ISWT or 6MWD<ul style="list-style-type: none"><li>ISWT thresholds were: ≥340 m (low risk), 190–330 m (intermediate risk), ≤180 m (high risk)</li></ul></div><div>3. RVEF where available</div><div>4. RAP where available</div><div>5. Cardiac index where available</div><div>6. SvO<sub>2</sub> where available</div></div> | <div><div>1. A minimum of ISWT and WHO FC were used to define a patient risk score at any risk assessment</div><div>2. Each variable was graded from 1 to 3 based on the ESC/ERS guidelines and cardiovascular magnetic resonance imaging</div><div>3. 1= ‘Low risk’, 2= ‘Intermediate risk’, and 3= ‘High risk’</div><div>4. A mean grade (sum of all grades/the number of parameters for each patient) was calculated and rounded off to the nearest integer, which was used to define the patient’s risk stratum</div></div> |

ISWT was used if 6MWD was not available, as ISWT is more commonly used at Sheffield Pulmonary Vascular Disease Unit. Both WHO FC and ISWT/6MWD were required to calculate a score as a minimum; if either were not available, the risk score was defined as ‘missing/undetermined’.

6MWD, 6-minute walk distance; ESC/ERS, European Society of Cardiology/European Respiratory Society; ISWT, incremental shuttle walk test; RAP, right atrial pressure; RVEF, right ventricular ejection fraction; SvO<sub>2</sub>, mixed venous oxygen saturation; WHO FC, World Health Organization functional class

Supplementary figure

Figure 1. Survival in patients after diagnosis with CTEPH

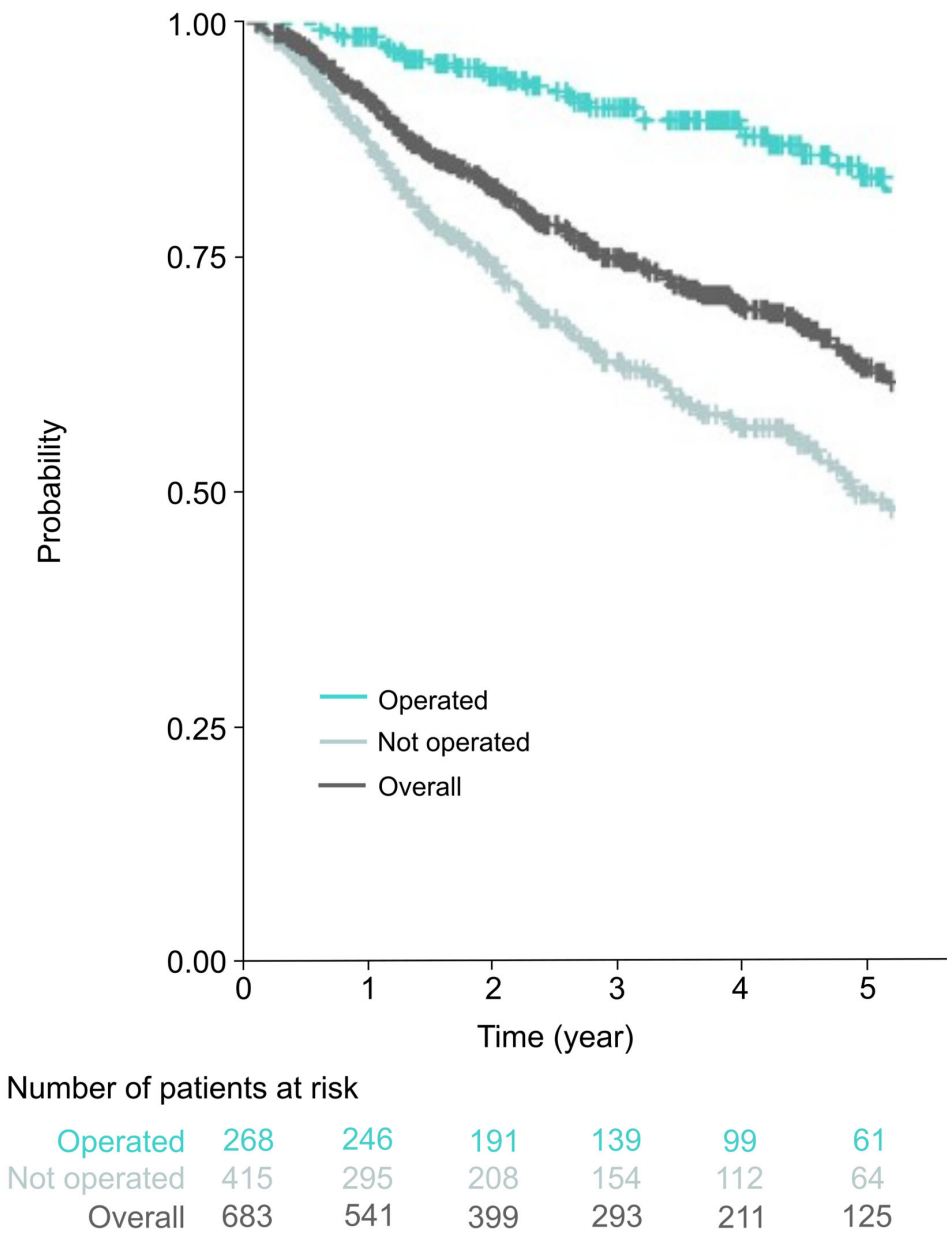

Small numbers were suppressed in line with data protection requirements. A result of '<7' substitutes any patient count that is below 7 unique patients and therefore masked for data privacy reasons. 'S\*' means that a number that has been 'Suppressed'. Values of zero or missing do not require suppression.

CTEPH, chronic thromboembolic pulmonary hypertension
